# Supplementary material
Source: PubMed Central journal article supplement (PMC5617800)
Supplement: NIHMS896448-supplement-2.pdf [file NIHMS896448-supplement-2.pdf]

## SUPPLEMENTARY TABLES

| Construct | E14.5            |            |          | E17.5            |          |               |
|-----------|------------------|------------|----------|------------------|----------|---------------|
|           | Embryos analysed | Fingertips | Digits   | Embryos analysed | Skulls   | Growth Plates |
| i1        | 9                | 0          | 1        | 8                | <b>3</b> | <b>7</b>      |
| i2        | 9                | 0          | 0        | 10               | 1        | <b>3</b>      |
| i3        | 7                | 0          | 0        | 5                | <b>2</b> | <b>4</b>      |
| i4        | 6                | 0          | 0        | 11               | <b>2</b> | <b>10</b>     |
| i5        | 5                | <b>3</b>   | <b>3</b> | 7                | <b>3</b> | <b>5</b>      |
| i6        | 12               | 0          | <b>9</b> | 7                | 1        | <b>7</b>      |
| i7        | 7                | <b>2</b>   | <b>3</b> | 6                | 1        | <b>6</b>      |
| i8        | 7                | 1          | <b>4</b> | 10               | <b>5</b> | <b>10</b>     |
| i9        | 5                | 0          | 0        | 6                | 1        | <b>5</b>      |

### Supplementary Table 1: Tissue-specific activity of enhancer elements.

Each stage shows total number of embryos analyzed for each construct as well as those displaying positive staining for the corresponding tissue. Positive scoring is indicated in bold.

| Construct          | Genomic Position           | Size | Guide  | Sequence                 |
|--------------------|----------------------------|------|--------|--------------------------|
| Del(2-9), Dup(int) | Chr1:75,015,710-75,091,187 | 75kb | N2-L1  | gagacacgtggagaattcgc-agg |
|                    |                            |      | N2-R1  | gttaccacactactacgtt-agg  |
| Del(4-6)           | Chr1:75,050,992-75,063,567 | 13kb | N4-L2  | ggacacgactttcataacac-tgg |
|                    |                            |      | N4-R2  | aatttcgggtagggcgttgg-agg |
| Del(7-9)           | Chr1:75,063,567-75,091,187 | 24kb | N4-R2  | aatttcgggtagggcgttgg-agg |
|                    |                            |      | N2-R1  | gttaccacactactacgtt-agg  |
| Del(4-9)           | Chr1:75,050,992-75,091,187 | 37kb | N4-L2  | ggacacgactttcataacac-tgg |
|                    |                            |      | N2-R1  | gttaccacactactacgtt-agg  |
| Dup(syn)           | Chr1:74,989,792-75,055,634 | 65kb | N9-L9  | agcgtggggcttttaaccgt-ggg |
|                    |                            |      | N9-R6  | ttagacacaccagtatacgg-agg |
| Dup(csp)           | Chr1:75,005,921-75,060,430 | 54kb | N10-L4 | ggggcaatctgatatagtgg-ggg |
|                    |                            |      | N10-R5 | tggcccctgaccctaggat-tgg  |

**Supplementary Table 2: Genomic rearrangements generated using CRISPR/Cas9 genome editing.**

Two sgRNAs flanking the target region were used to generate the genomic rearrangement.

| Construct                  | Genomic Position           | Size | Primer           | Sequence                                                                                       |
|----------------------------|----------------------------|------|------------------|------------------------------------------------------------------------------------------------|
| centromeric homologous arm |                            |      |                  |                                                                                                |
| SB-HR-L1                   | Chr1:75,055,877-75,058,875 | 3kb  | HR3a1-f-Sall     | tata <b>gtcgacc</b> aaagtccttgaaggaacagcagt                                                    |
|                            |                            |      | HR3a1-r-Clal     | tata <b>atcgatg</b> acatgcctctgctgtacatagttt                                                   |
| SB-HR-L2                   | Chr1:75,058,877-75,060,875 | 2kb  | HR3a2-f-F3-Clal  | tata <b>atcgatt</b> acaagcttacgaagttcctattcttcaaatagtat<br>aggaacttcagcaactcaggaagaattcctaacac |
|                            |                            |      | HR3a2-r-F3-SaclI | tata <b>ccgagg</b> tagaagttcctatactatttgaagaataggaactt<br>cttcagccctctatagaaatgga              |
| telomeric homologous arm   |                            |      |                  |                                                                                                |
| SB-HR-R                    | Chr1:75,060,877-75,063,875 | 3kb  | HR3b-f-XhoI      | tata <b>ctcgagt</b> ctataagaacacacaacaatgtgccag                                                |
|                            |                            |      | HR3b-r-NotI      | tata <b>gcggccgc</b> actgttctgggtgaaccagaaatctt                                                |

**Supplementary Table 3: Homologous arms cloned for the insertion of the SB cassette.**

Cloning of the centromeric arm (total size 5kb) was performed in two steps (constructs SB-HR-L1 and SB-HR-L2). Restriction sites are shown in italic/bold.

| Element | Vista ID | Primer forward, reverse                               | Genomic Position (mm9)     | Size (bp) |
|---------|----------|-------------------------------------------------------|----------------------------|-----------|
| i1      | mm1142   | ctcagtgtctcaaccacttgaa,<br>ctctgcatgacttcttgta        | chr1:75,008,008-75,012,847 | 4840      |
| i2      | mm1143   | ggtaggattaatctctgactg,<br>ggtaggaacagcagtagtgaa       | chr1:75,023,290-75,026,536 | 3247      |
| i3      | mm1148   | tctcccagacaaaatgcttat,<br>aacctgacctcatgaagtta        | chr1:75,046,263-75,049,025 | 2763      |
| i4      | mm1144   | cagactggagttcacagagtg,<br>actcaggcacaagtctagcaca      | chr1:75,051,762-75,053,663 | 1902      |
| i5      |          | cctctgtgctcttgagttgactac,<br>cctcctgctagttcttacctaaga | chr1:75,053,880-75,055,928 | 2045      |
| i6      | mm1145   | tcctgagagactccagaaagg,<br>tccccatatcagatgtttacc       | chr1:75,059,085-75,064,020 | 4936      |
| i7      | mm1146   | gtactgggaaaaatggcaagag,<br>ctgaaaggggttagaaggact      | chr1:75,068,299-75,072,430 | 4132      |
| i8      |          | ttgaggcagaaggattgtcata,<br>agccagaggtcaacatttgagt     | chr1:75,075,786-75,080,268 | 4483      |
| i9      | mm1439   | gctgagatgaatgacagtgagg,<br>gtcacacctgatgatctgcatt     | chr1:75,085,302-75,089,234 | 3933      |

**Supplementary Table 4: Genomic regions tested for enhancer activity.**

| Primer                    | Sequence                |
|---------------------------|-------------------------|
| <i>Gapdh</i> -F           | GGGAAGCCCATCACCATCTT    |
| <i>Gapdh</i> -R           | CGGCCTCACCCATTG         |
| <i>Ihh</i> -F             | GCCGACCGCCTCATGAC       |
| <i>Ihh</i> -R             | CATGACAGAGATGGCCAGTGA   |
| <i>Nhej1</i> -F (exon3+4) | TGAAGACAGAGCCATTTGAAGA  |
| <i>Nhej1</i> -R (exon3+4) | GCTTTCATCACCAACAGCA     |
| <i>Nhej1</i> -F (exon2+3) | CATTGCTTCGGATGAAGGACC   |
| <i>Nhej1</i> -R (exon2+3) | TCAATCGACTTCGGCTCAG     |
| <i>Cnppd1</i> -F          | CCTATTCGCCGACTCCAGAAA   |
| <i>Cnppd1</i> -R          | CATTCGTCATTGAAGACCTCCTC |
| <i>Fam134a</i> -F         | CACAAACATGACAAGAGAAAGCG |
| <i>Fam134a</i> -R         | AGCTCAGAGTCTGTAATAGCCA  |

**Supplementary Table 5: qPCR primer sequences.**

| Viewpoint           | 1 <sup>st</sup> primer (5' – 3') | Genomic Position           | 2 <sup>nd</sup> primer (5' – 3') | Genomic Position           |
|---------------------|----------------------------------|----------------------------|----------------------------------|----------------------------|
| <i>lhh</i> promoter | ACAGCTGGGGACCCTATAC              | chr1:74,998,765-74,998,783 | CCCGTCAGGAGGACAATC               | chr1:75,059,837-75,059,854 |

**Supplementary Table 6: 4C-seq primer sequences.**

For reference, the mm9 mouse genome was used.
